# Supplementary material
Source: HighWire-hosted journal article supplement (doi:10.1101/rna.079546.122)
Supplement: Supplemental_Figures_S1-S4.docx [file Supplemental_Figures_S1-S4.docx]

**SUPPLEMENTARY INFORMATION**

**Identification of Up47 in three thermophilic and one mesophilic archaea and one hyperthermophilic bacterium**

Philippe Wolff1*, Antony Lechner1, Louis Droogmans2, Henri Grosjean2, Eric Westhof1*

1 Architecture et Réactivité de l’ARN, Institut de Biologie Moléculaire et Cellulaire du CNRS, Université de Strasbourg, F-67084, Strasbourg, France

2 Laboratoire de Chimie Biologique, Université Libre de Bruxelles, Institut Labiris, Avenue Emile Gryzon 1, B-1070, Belgium

*** Correspondence:**

Eric Westhof
e.westhof@ibmc-cnrs.unistra.fr

Philippe Wolff
p.wolff@ibmc-cnrs.unistra.fr


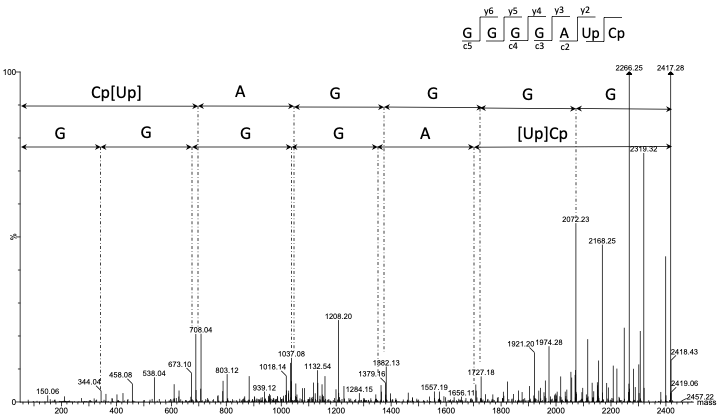


Figure S1. Deconvoluted MS/MS sequencing spectrum of *M. maripaludis* Arg-tRNA-UCU containing Up47 after RNase A digestion (m/z = 1208,14 z =-2).


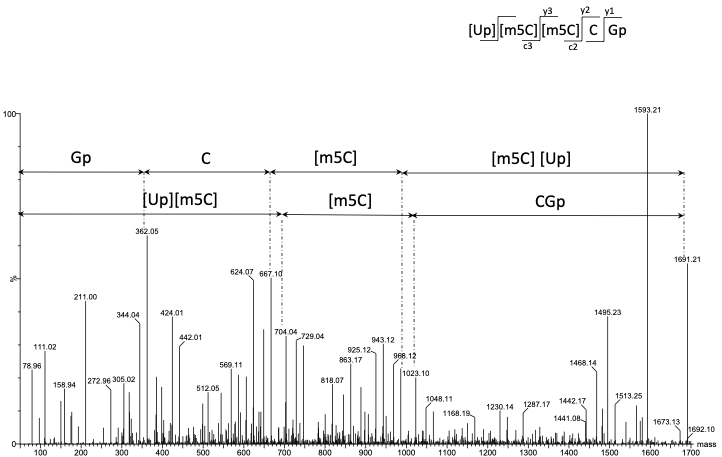


Figure S2. Deconvoluted MS/MS sequencing spectrum of *P. furiosus* Thr-tRNA-GGUcontaining Up47 after RNase T1 digestion (m/z = 845,12 z =-2).


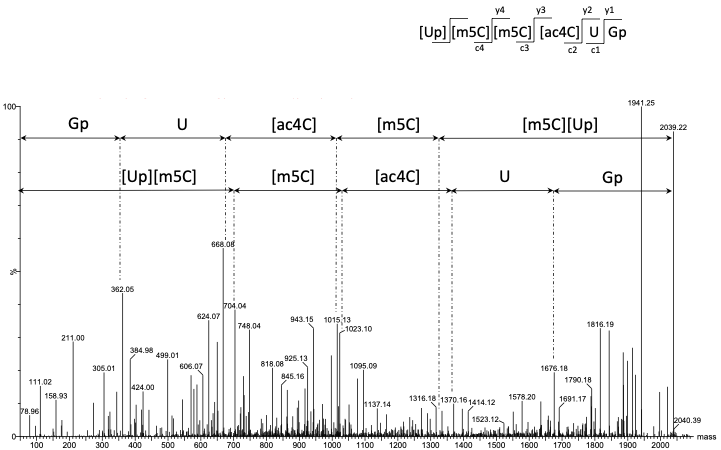


Figure S3. Deconvoluted MS/MS sequencing spectrum of *S. shibatae* Ini-tRNA-CAU containing Up47 after RNase T1 digestion (m/z = 1019,11 z =-2).


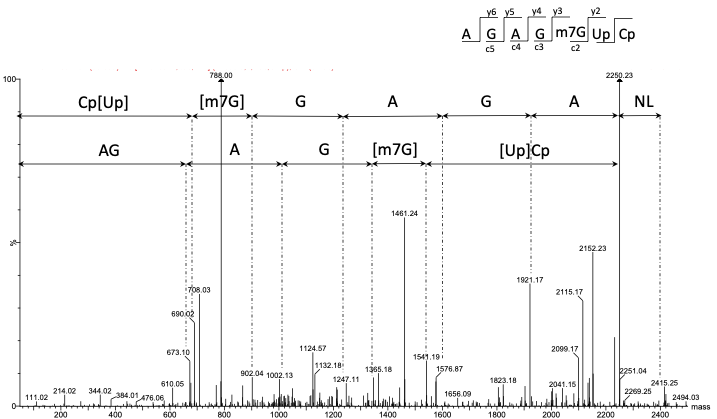


Figure S4. Deconvoluted MS/MS sequencing spectrum of *A. aeolicus* Val-tRNA-Pro-GGGcontaining Up47 after RNase A digestion (m/z = 1207,15 z =-2). NL corresponds to the neutral loss of the m7G base during CID fragmentation.
